# Supplementary material for: Transcriptional Profiling of the Small Intestine and the Colon Reveals Modulation of Gut Infection with Citrobacter rodentium According to the Vitamin A Status
Source: MDPI journal article supplement (doi:10.3390/nu14081563), 2022-04-08
Supplement: s1 [file s1]

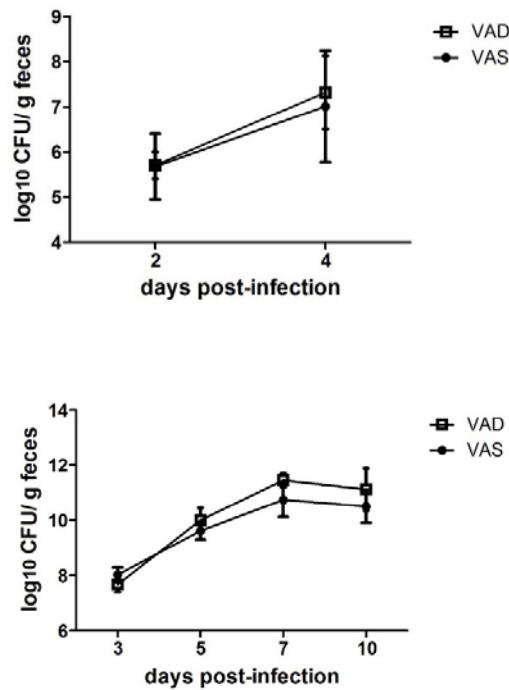

| Source of Variation | P value  |
|---------------------|----------|
| Interaction         | 0.6695   |
| VA status           | 0.3195   |
| Time                | < 0.0001 |

**Supplementary Figure S1. *C. rodentium* clearance shows no significant difference between infected VAD and VAS mice during the course of the SI and the colon studies.**

*C. rodentium* bacterial shedding in the feces. (a) the SI study stopped on p.i. day 5. Fecal samples were collected twice on p.i. day 2 & day 4 and plated on LB agar plate (with nalidixic acid) for overnight incubation. (b) the colon study lasted until p.i. day 10. Feces were collected on p.i. day 3, 5, 7 and 10. Values are the mean  $\pm$  SEM of n=3-5 mice per group. Two-way ANOVA test with P<0.05 as cutoff.

**Abbreviation:** Colony-forming unit (CFU), vitamin A (VA), vitamin A deficient (VAD), vitamin A sufficient (VAS), small intestine (SI), Luria-Bertani (LB), standard error of the mean (SEM), analysis of variance (ANOVA)

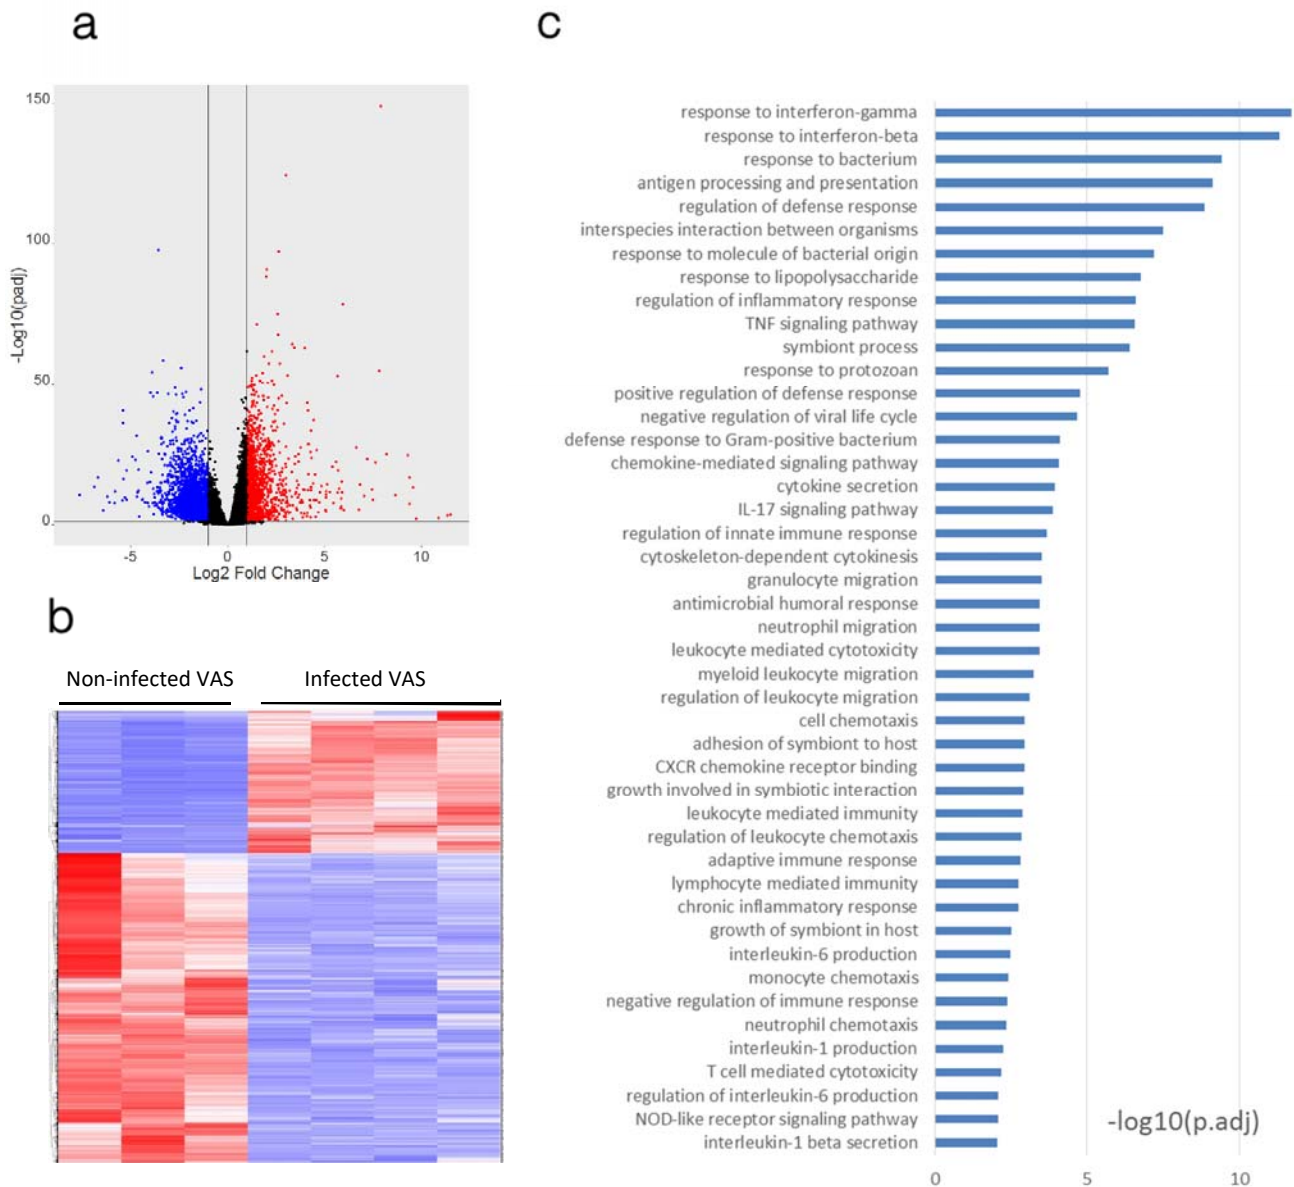

**Supplementary Figure S2. Transcriptomic changes corresponding to the VAS-inf in colon study.**

(a) Volcano plot of DEGs. Red: DEGs upregulated by infection in colon; Blue: DEGs downregulated by infection in colon; Black: non-DEGs. Horizontal line:  $\text{padj}=0.05$ . Vertical lines:  $|\text{Fold Change}|=2$ . (b) Heatmap of DEGs. Red group: mean expression significantly higher; Blue group: mean expression significantly lower. Non-infected VAS: columns 1, 2 and 3; Infected VAS: columns 4, 5, 6 and 7. (c) DEGs upregulated during VAS-inf were enriched in immune-related GO and KEGG categories. Criteria:  $\text{p.adj}<0.05$ . For a full list of DEGs corresponding to VAS-inf in colon study, see List I in the supplemental Excel file.

**Abbreviations:**  $\text{padj}$ : adjusted p value according to DESeq2, differentially expressed gene (DEG), vitamin A deficient (VAD), vitamin A sufficient (VAS), Infection effect under VAS status (VAS-Inf),  $\text{p.adj}$  (BH-adjusted p value from the hypergeometric test conducted by ClusterProfiler), Gene ontology (GO), Kyoto Encyclopedia of Genes and Genomes (KEGG).

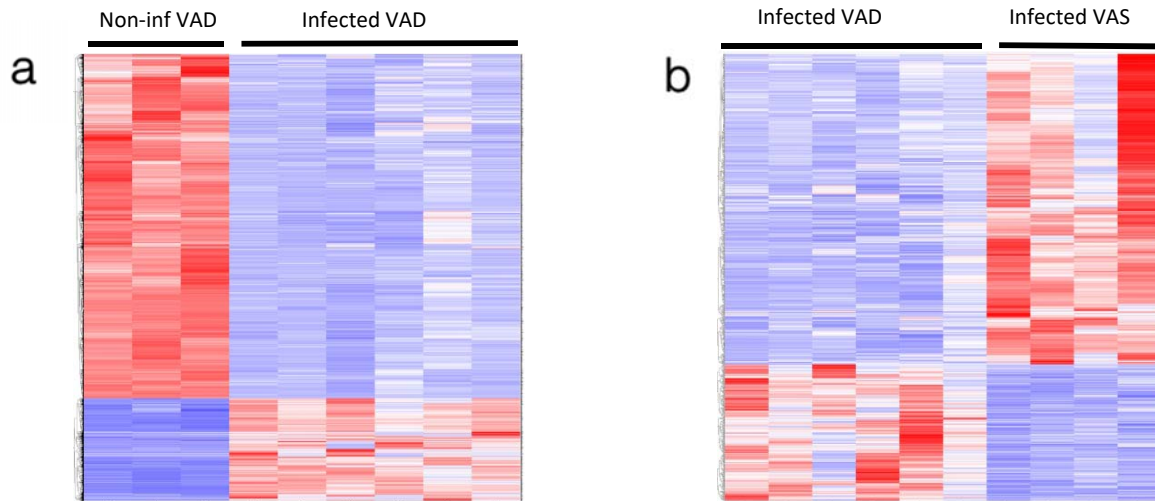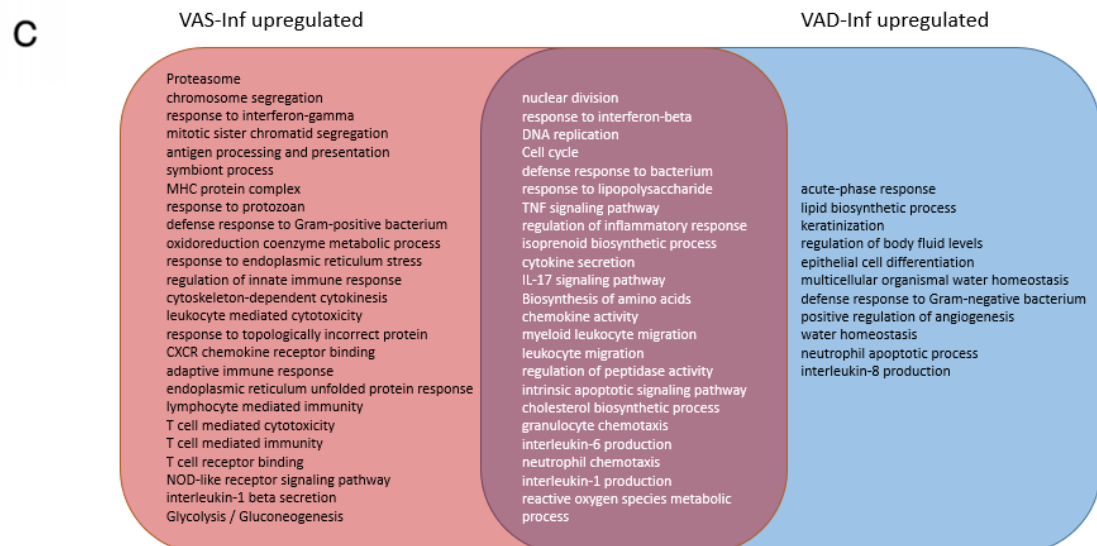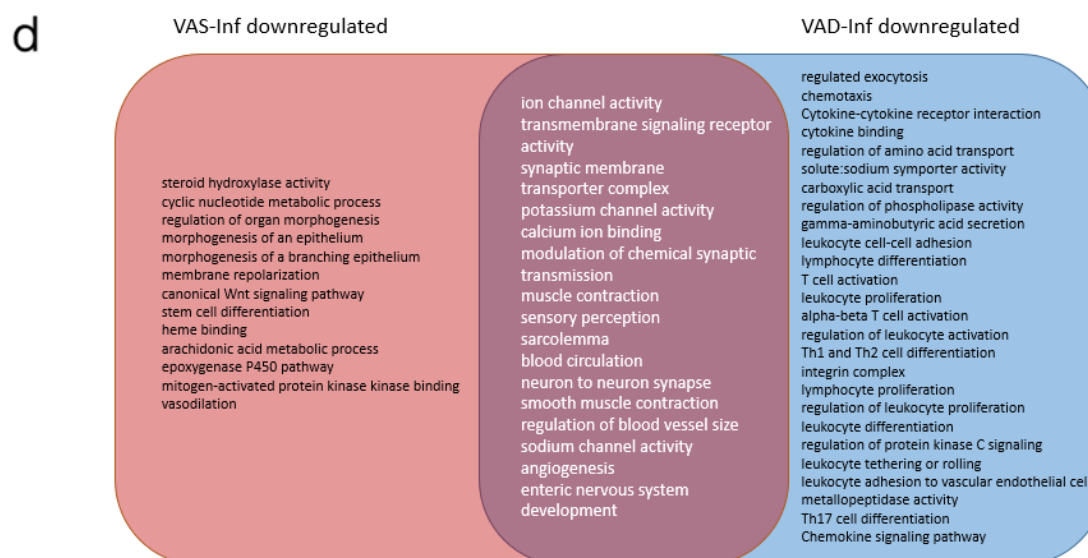

**Supplementary Figure S3. Transcriptomic changes corresponding to VAD-Inf and the VA effect under infection in colon study.**

Heatmaps of DEGs corresponding to the **(a)** VAD-Inf (Non-infected VAD: columns 1, 2 and 3; Infected VAD: columns 4 to 9) and **(b)** VA effect under infection (Infected VAD: columns 1 to 6; Infected VAS: columns 7 to 10). Red group: mean expression significantly higher; Blue group: mean expression significantly lower. Comparison of representative GO and KEGG terms enriched among upregulated DEGs during infection **(c)** or downregulated DEGs during infection **(d)** between VAS-inf vs VAD-inf. Criteria:  $p_{\text{adj}} < 0.05$ . For a full list of DEGs corresponding to VAS-inf, VAD-inf, and VA effect under infection, in colon study, see List I, II, and III in the supplemental Excel file.

**Abbreviations:** differentially expressed gene (DEG), vitamin A deficient (VAD), vitamin A sufficient (VAS), Gene ontology (GO), Kyoto Encyclopedia of Genes and Genomes (KEGG), Infection effect under VAS status (VAS-Inf), Infection effect under VAD status (VAD-Inf).  $p_{\text{adj}}$ : BH-adjusted p value from the hypergeometric test done by ClusterProfiler.

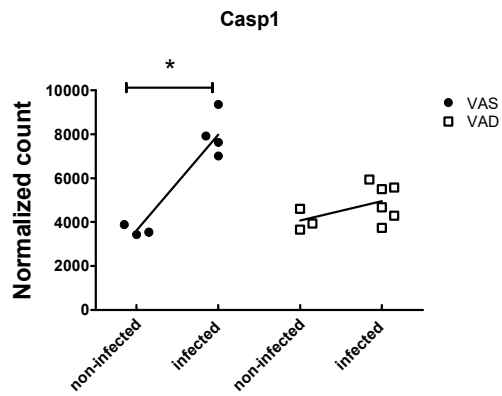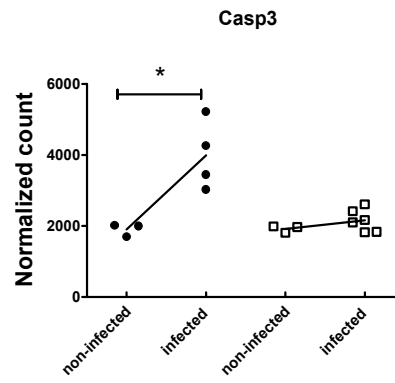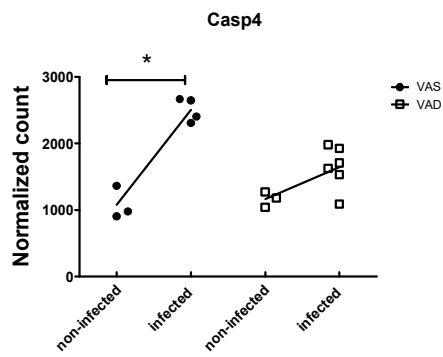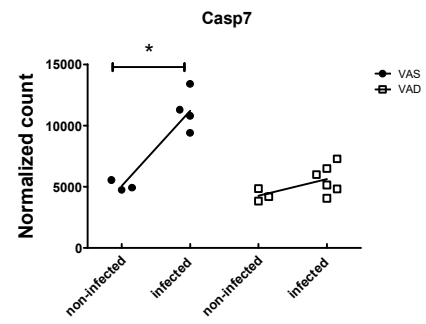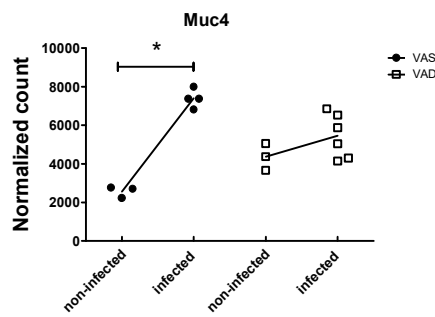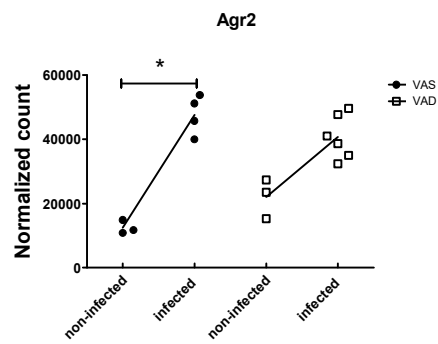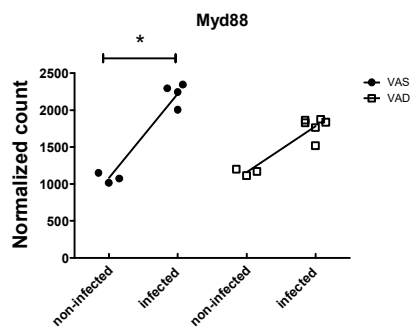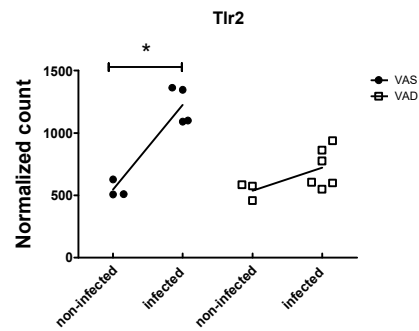

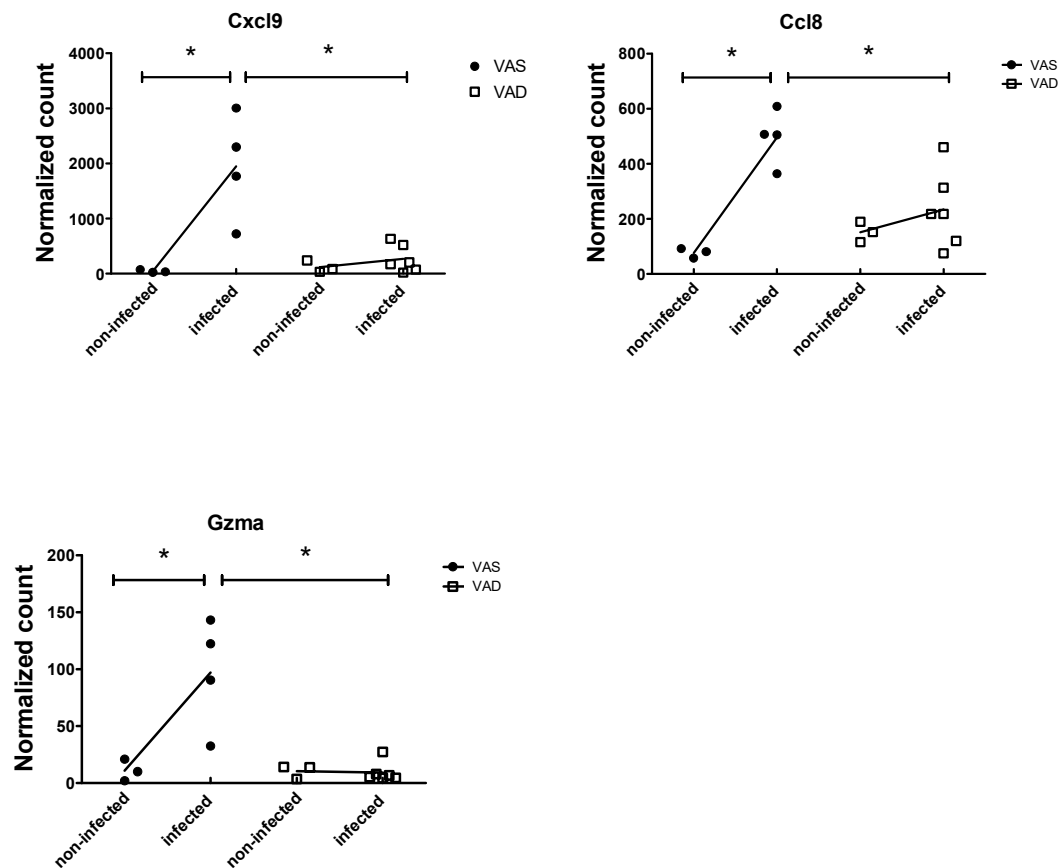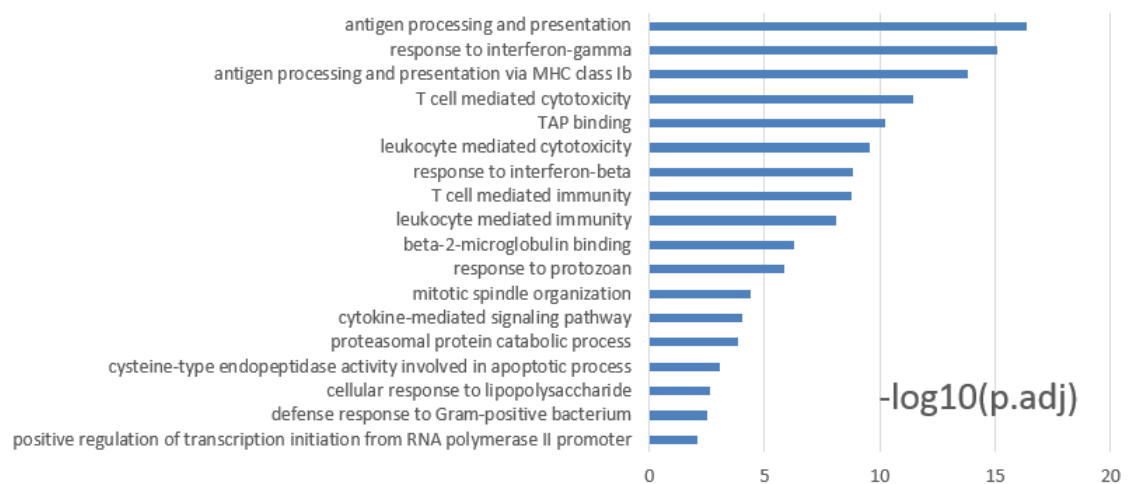

#### Supplementary Figure S4. Transcriptomic changes in Scenario 1.

(a-k) Representative DEGs corresponding to Scenario 1 in the colon study. \*in the differential expression analysis, adjusted p value  $<0.05$  and  $|\text{FoldChange}| > 2$ .

(I) GO and KEGG enrichment terms of DEGs corresponding to Scenario 1 in the colon study. Criteria:  $p_{\text{adj}} < 0.05$ . For a full list of genes corresponding to Scenario 1 of the Interaction effect, see Scenario 1 in the supplemental Excel file.

**Abbreviations:** differentially expressed gene (DEG), vitamin A deficient (VAD), vitamin A sufficient (VAS),  $p_{\text{adj}}$  (BH-adjusted p value from the hypergeometric test conducted by ClusterProfiler), Gene ontology (GO), Kyoto Encyclopedia of Genes and Genomes (KEGG).

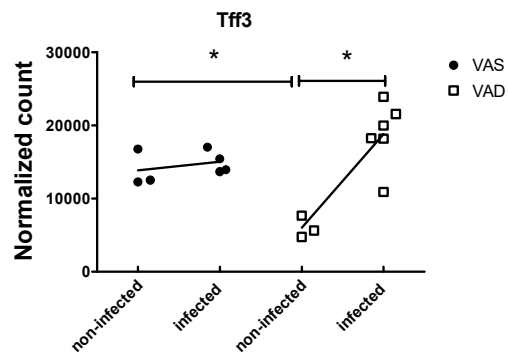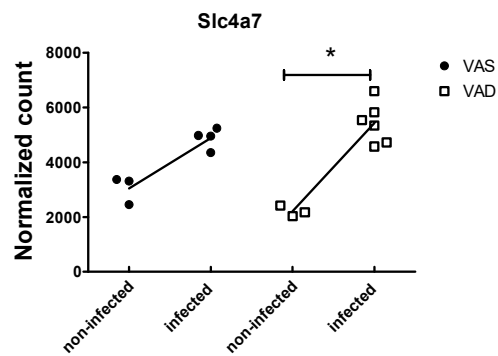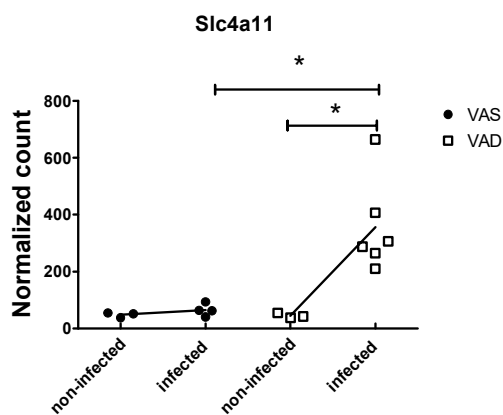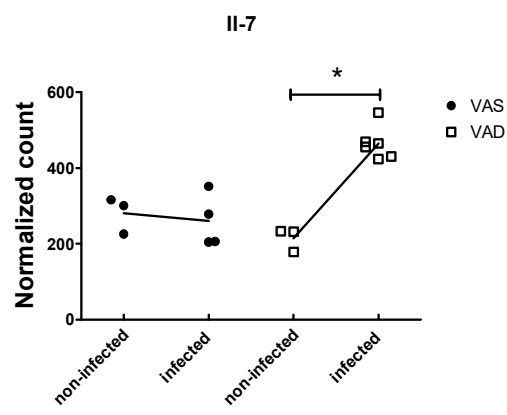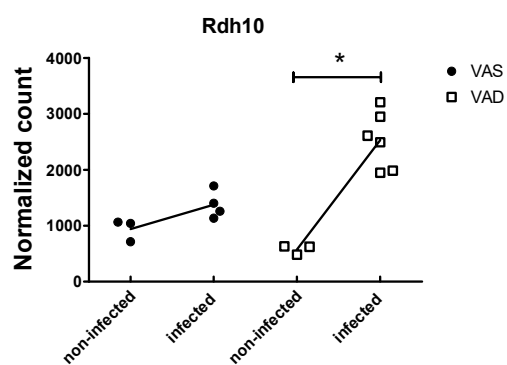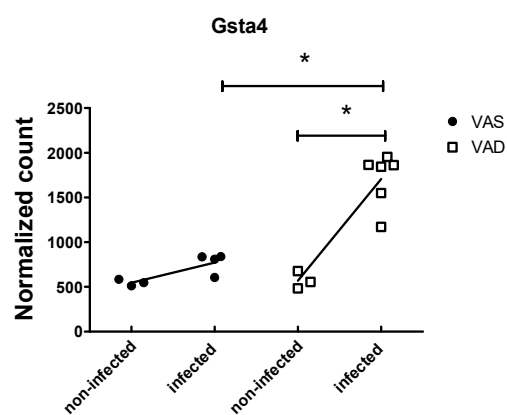



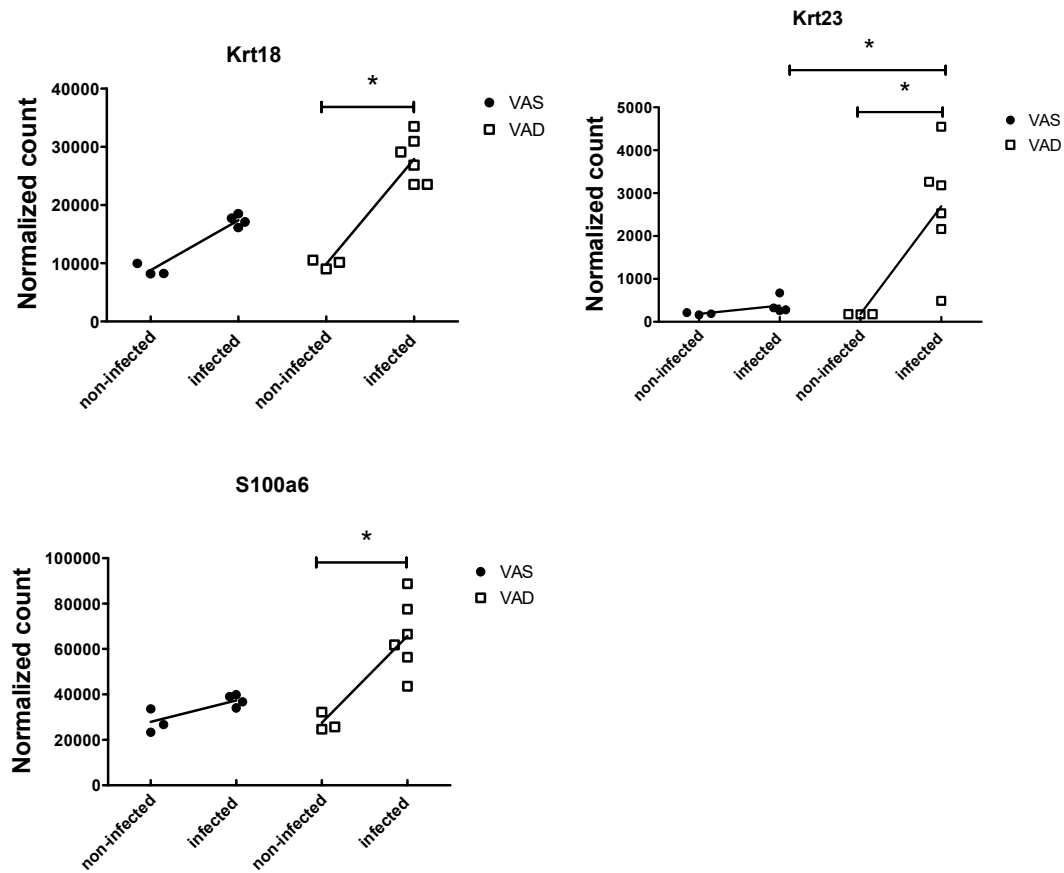

**Supplementary Figure S5. Representative DEGs corresponding to Scenario 3 in the colon study.**

\*in the differential expression analysis, adjusted p value <0.05 and |FoldChange|>2. For a full list of genes corresponding to Scenario 3 of the Interaction effect, see Scenario 3 in the supplemental Excel file.  
**Abbreviations:** differentially expressed gene (DEG), vitamin A deficient (VAD), vitamin A sufficient (VAS).

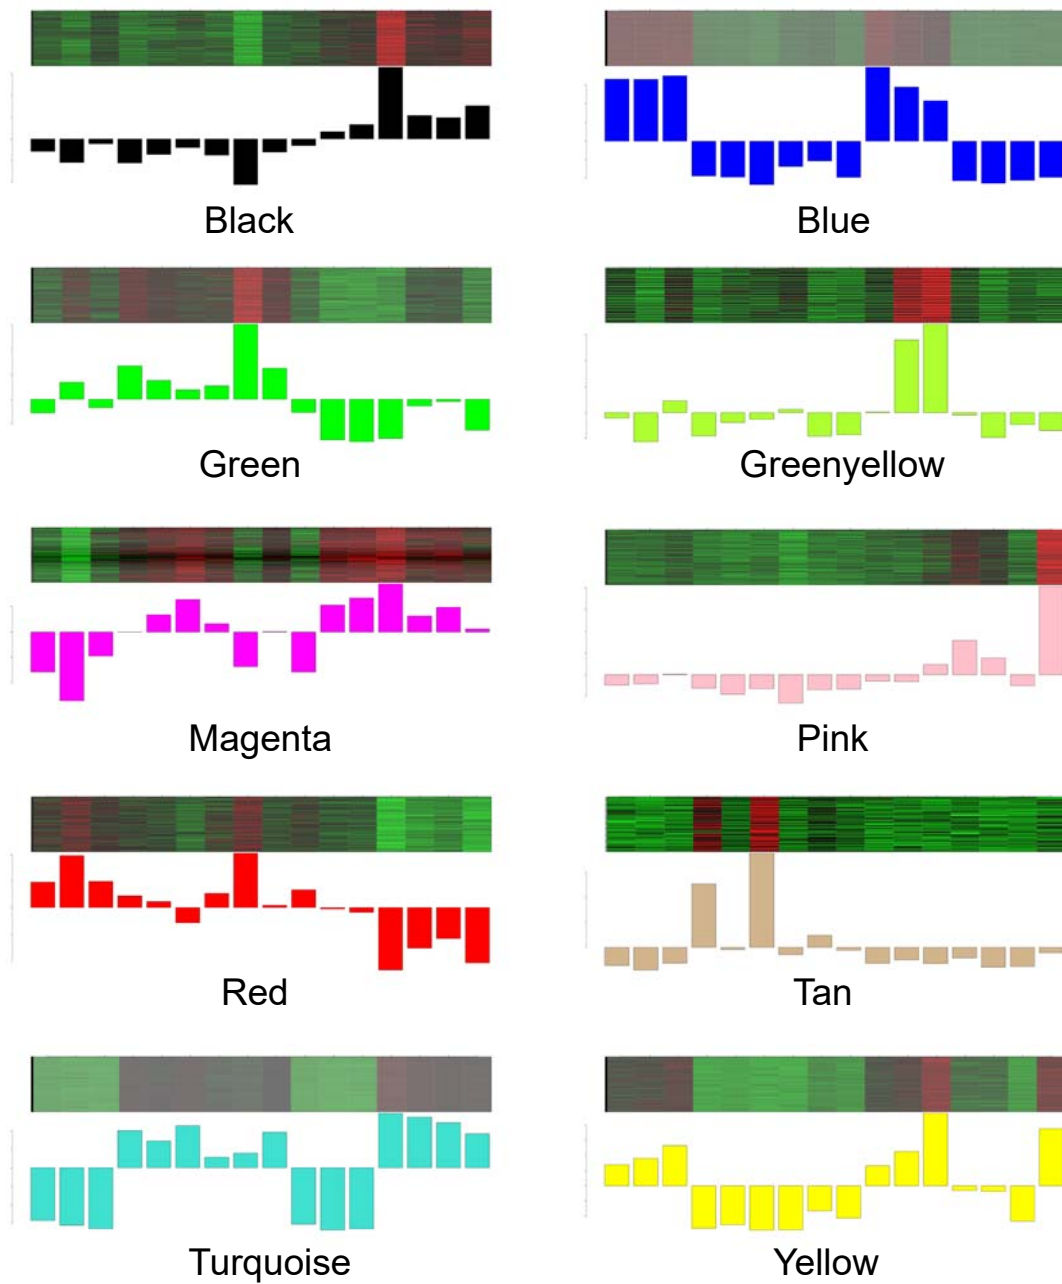

**Supplementary Figure S6.** Module eigengenes in colon WGCNA network. Eigengenes values (Y axis) of modules across samples (X axis) are visualized. Purple and Brown modules are shown in Figure 6. For full lists of genes of each module, see supplemental Excel file. In each heatmaps, Red: Higher expression; Green: Lower expression. non-infected VAD: columns 1, 2, and 3. Infected VAD: columns 4, 5, 6, 7, 8, and 9. non-infected VAS: columns 10, 11, and 12. Infected VAS: 13, 14, 15, and 16.

**Supplementary Table S1.** Immune- and epithelial-related DEGs upregulated and downregulated in VAS-Inf in colon study

Infected VAS group (n=4) vs non-infected VAS group (n=3). The order is ranked alphabetically by the Official Gene Symbol. DEGs are organized into immune cell-related and epithelial cell-related, the two major cell categories in the intestine. For a full list of DEGs corresponding to VAS-inf in colon study, see List I in the supplemental Excel file.

**Abbreviations:**

Differentially expressed gene (DEG)

Infection effect under VAS status (VAS-Inf)

BaseMean: Mean expression level (normalized by DESeq2) across all 16 libraries

Fold Change: Normalized mean expression level of Infected VAS group / Normalized mean expression level of non-infected VAS group

padj: adjusted p value calculated by DESeq2

**DEGs upregulated in VAS-Inf in colon study**

*Immune cell-related*

|        | baseMean | FoldChange | padj     | ENTREZID | Fullname                                             |
|--------|----------|------------|----------|----------|------------------------------------------------------|
| Casp1  | 5288.81  | 2.21       | 6.10E-13 | 12362    | caspase 1                                            |
| Casp3  | 2524.49  | 2.09       | 1.67E-09 | 12367    | caspase 3                                            |
| Casp4  | 1664.04  | 2.32       | 1.74E-10 | 12363    | caspase 4 apoptosis-related cysteine peptidase       |
| Casp7  | 6669.61  | 2.21       | 3.34E-10 | 12369    | caspase 7                                            |
| Casp8  | 4625.84  | 2.56       | 2.12E-26 | 12370    | caspase 8                                            |
| Ccl2   | 66.03    | 9.22       | 8.88E-08 | 20296    | chemokine (C-C motif) ligand 2                       |
| Ccl3   | 30.48    | 6.07       | 3.56E-02 | 20302    | chemokine (C-C motif) ligand 3                       |
| Ccl7   | 147.46   | 15.32      | 2.88E-13 | 20306    | chemokine (C-C motif) ligand 7                       |
| Ccl8   | 254.30   | 6.46       | 1.82E-09 | 20307    | chemokine (C-C motif) ligand 8                       |
| Ccl9   | 585.17   | 2.38       | 9.26E-19 | 20308    | chemokine (C-C motif) ligand 9                       |
| Cxcl1  | 173.53   | 22.74      | 1.10E-18 | 14825    | chemokine (C-X-C motif) ligand 1                     |
| Cxcl10 | 324.91   | 8.10       | 1.29E-04 | 15945    | chemokine (C-X-C motif) ligand 10                    |
| Cxcl11 | 24.02    | 14.60      | 8.57E-09 | 56066    | chemokine (C-X-C motif) ligand 11                    |
| Cxcl2  | 168.47   | 57.78      | 2.40E-07 | 20310    | chemokine (C-X-C motif) ligand 2                     |
| Cxcl3  | 52.33    | 665.37     | 2.34E-08 | 330122   | chemokine (C-X-C motif) ligand 3                     |
| Cxcl5  | 1697.03  | 197.90     | 8.09E-23 | 20311    | chemokine (C-X-C motif) ligand 5                     |
| Cxcl9  | 618.94   | 43.85      | 1.45E-08 | 17329    | chemokine (C-X-C motif) ligand 9                     |
| Cxcr2  | 27.50    | 7.82       | 2.03E-03 | 12765    | chemokine (C-X-C motif) receptor 2                   |
| Fcgr1  | 86.01    | 2.28       | 3.56E-05 | 14129    | Fc receptor IgG high affinity I                      |
| Gprc5a | 9824.63  | 2.99       | 7.65E-15 | 232431   | G protein-coupled receptor family C group 5 member A |
| Il11   | 40.79    | 4.59       | 3.82E-04 | 16156    | interleukin 11                                       |

|           |          |        |          |        |                                                        |
|-----------|----------|--------|----------|--------|--------------------------------------------------------|
| Il18bp    | 725.08   | 11.29  | 3.86E-25 | 16068  | interleukin 18 binding protein                         |
| Il18rap   | 88.72    | 2.38   | 5.03E-03 | 16174  | interleukin 18 receptor accessory protein              |
| Il1f9     | 23.31    | 64.18  | 4.95E-06 | 215257 | interleukin 1 family member 9                          |
| Il1r2     | 52.24    | 4.24   | 1.42E-03 | 16178  | interleukin 1 receptor type II                         |
| Il1rl1    | 163.50   | 5.34   | 9.57E-06 | 17082  | interleukin 1 receptor-like 1                          |
| Il4ra     | 2680.26  | 2.59   | 8.64E-14 | 16190  | interleukin 4 receptor alpha                           |
| Lcn2      | 318.99   | 35.26  | 2.39E-15 | 16819  | lipocalin 2                                            |
| Mmp19     | 570.07   | 3.34   | 9.38E-15 | 58223  | matrix metalloproteinase 19                            |
| Mmp28     | 505.07   | 4.33   | 2.62E-17 | 118453 | matrix metalloproteinase 28 (epilysin)                 |
| Mmp3      | 181.18   | 3.55   | 8.49E-05 | 17392  | matrix metalloproteinase 3                             |
| Mmp7      | 198.28   | 42.39  | 1.98E-21 | 17393  | matrix metalloproteinase 7                             |
| Myd88     | 1642.45  | 2.06   | 1.49E-30 | 17874  | myeloid differentiation primary response gene 88       |
| Nipal1    | 1415.55  | 2.23   | 5.31E-11 | 70701  | NIPA-like domain containing 1                          |
| Nlrc5     | 1218.75  | 6.76   | 1.78E-08 | 434341 | NLR family CARD domain containing 5                    |
| Nod2      | 211.34   | 3.36   | 1.48E-11 | 257632 | nucleotide-binding oligomerization domain containing 2 |
| Pdpm      | 775.98   | 2.99   | 2.54E-08 | 14726  | podoplanin                                             |
| Pycard    | 5977.48  | 2.10   | 2.14E-14 | 66824  | PYD and CARD domain containing                         |
| Reg3b     | 4183.62  | 131.67 | 4.04E-11 | 18489  | regenerating islet-derived 3 beta                      |
| Reg3g     | 2392.01  | 59.81  | 2.00E-12 | 19695  | regenerating islet-derived 3 gamma                     |
| S100a10   | 14623.21 | 2.74   | 4.31E-16 | 20194  | S100 calcium binding protein A10 (calpactin)           |
| S100a11   | 10864.21 | 3.79   | 3.98E-31 | 20195  | S100 calcium binding protein A11                       |
| S100a14   | 12448.46 | 4.88   | 1.68E-62 | 66166  | S100 calcium binding protein A14                       |
| S100a16   | 14187.12 | 3.92   | 6.31E-89 | 67860  | S100 calcium binding protein A16                       |
| S100a8    | 1492.11  | 631.53 | 2.08E-25 | 20201  | S100 calcium binding protein A8 (calgranulin A)        |
| S100a9    | 1558.94  | 673.48 | 1.85E-17 | 20202  | S100 calcium binding protein A9 (calgranulin B)        |
| Saa2      | 24.97    | 3.60   | 2.80E-03 | 20209  | serum amyloid A 2                                      |
| Saa3      | 673.21   | 11.65  | 1.07E-06 | 20210  | serum amyloid A 3                                      |
| Saa4      | 34.08    | 13.93  | 5.23E-05 | 20211  | serum amyloid A 4                                      |
| Tlr2      | 780.49   | 2.24   | 2.04E-09 | 24088  | toll-like receptor 2                                   |
| Tnf       | 241.16   | 4.98   | 9.04E-04 | 21926  | tumor necrosis factor                                  |
| Tnfaip2   | 472.93   | 2.18   | 9.75E-04 | 21928  | tumor necrosis factor alpha-induced protein 2          |
| Tnfaip3   | 8635.85  | 4.13   | 6.13E-16 | 21929  | tumor necrosis factor alpha-induced protein 3          |
| Tnfaip8   | 2231.86  | 2.22   | 2.30E-23 | 106869 | tumor necrosis factor alpha-induced protein 8          |
| Tnfrsf12a | 617.11   | 2.08   | 9.83E-03 | 27279  | tumor necrosis factor receptor superfamily member 12a  |

|          |         |       |          |       |                                                      |
|----------|---------|-------|----------|-------|------------------------------------------------------|
| Tnfrsf1a | 4355.18 | 2.65  | 7.14E-39 | 21937 | tumor necrosis factor receptor superfamily member 1a |
| Tnfrsf1b | 3441.58 | 5.51  | 2.61E-34 | 21938 | tumor necrosis factor receptor superfamily member 1b |
| Tnfrsf23 | 250.77  | 5.29  | 3.00E-10 | 79201 | tumor necrosis factor receptor superfamily member 23 |
| Tnfrsf8  | 253.70  | 13.66 | 2.54E-28 | 21941 | tumor necrosis factor receptor superfamily member 8  |
| Tnfsf10  | 1163.77 | 4.06  | 9.08E-09 | 22035 | tumor necrosis factor (ligand) superfamily member 10 |
| Tnfsf9   | 87.63   | 2.79  | 4.89E-05 | 21950 | tumor necrosis factor (ligand) superfamily member 9  |

## DEGs upregulated in VAS-Inf in colon study

### *Epithelial cell-originated*

|         | baseMean  | FoldChange | padj     | ENTREZID | Fullname                                     |
|---------|-----------|------------|----------|----------|----------------------------------------------|
| Aacs    | 5184.43   | 2.18       | 2.88E-08 | 78894    | acetoacetyl-CoA synthetase                   |
| Actb    | 109598.47 | 2.33       | 2.46E-30 | 11461    | actin beta                                   |
| Agr2    | 33626.68  | 3.82       | 5.46E-22 | 23795    | anterior gradient 2                          |
| Ak4     | 1004.18   | 4.72       | 4.91E-09 | 11639    | adenylate kinase 4                           |
| Areg    | 1083.09   | 4.96       | 2.88E-16 | 11839    | amphiregulin                                 |
| Barx2   | 188.38    | 2.57       | 8.34E-13 | 12023    | BarH-like homeobox 2                         |
| Ccnd1   | 4755.04   | 3.16       | 2.61E-12 | 12443    | cyclin D1                                    |
| Cd177   | 17774.21  | 4.94       | 1.21E-29 | 68891    | CD177 antigen                                |
| Cd274   | 464.99    | 2.25       | 9.97E-04 | 60533    | CD274 antigen                                |
| Cd38    | 12742.75  | 3.32       | 1.56E-17 | 12494    | CD38 antigen                                 |
| Cebpd   | 1316.13   | 2.40       | 9.24E-07 | 12609    | CCAAT/enhancer binding protein (C/EBP) delta |
| Ckap4   | 3904.11   | 6.18       | 1.14E-45 | 216197   | cytoskeleton-associated protein 4            |
| Clca3a1 | 692.05    | 2.09       | 3.31E-06 | 12722    | chloride channel accessory 3A1               |
| Clca3a2 | 1456.17   | 3.26       | 1.96E-07 | 80797    | chloride channel accessory 3A2               |
| Clca3b  | 37907.11  | 5.23       | 7.44E-20 | 229927   | chloride channel accessory 3B                |
| Clca4a  | 4326.95   | 2.02       | 3.74E-02 | 99663    | chloride channel accessory 4A                |
| Clca4b  | 35258.66  | 100.00     | 2.54E-28 | 99709    | chloride channel accessory 4B                |
| Cldn7   | 27621.70  | 2.20       | 9.32E-25 | 53624    | claudin 7                                    |
| Cldn8   | 4811.96   | 2.13       | 7.43E-04 | 54420    | claudin 8                                    |
| Duox2   | 11343.50  | 3.22       | 1.86E-06 | 214593   | dual oxidase 2                               |
| Duoxa2  | 4801.28   | 6.12       | 4.41E-15 | 66811    | dual oxidase maturation factor 2             |
| E2f2    | 2370.11   | 8.17       | 4.60E-44 | 242705   | E2F transcription factor 2                   |
| Fdps    | 6681.29   | 4.37       | 3.98E-58 | 110196   | farnesyl diphosphate synthetase              |
| Fut2    | 9180.17   | 6.02       | 2.14E-68 | 14344    | fucosyltransferase 2                         |

|         |          |        |           |        |                                                     |
|---------|----------|--------|-----------|--------|-----------------------------------------------------|
| Gbp2    | 4786.18  | 9.23   | 6.75E-13  | 14469  | guanylate binding protein 2                         |
| Glt28d2 | 345.83   | 2.18   | 1.22E-06  | 320302 | glycosyltransferase 28 domain containing 2          |
| Gml     | 60.49    | 175.86 | 1.62E-13  | 625599 | glycosylphosphatidylinositol anchored molecule like |
| Gzma    | 31.73    | 8.94   | 5.12E-05  | 14938  | granzyme A                                          |
| Ifi35   | 1134.17  | 2.03   | 2.37E-15  | 70110  | interferon-induced protein 35                       |
| Igtp    | 2877.98  | 19.70  | 3.22E-14  | 16145  | interferon gamma induced GTPase                     |
| Iqgap2  | 13155.93 | 2.36   | 6.40E-11  | 544963 | IQ motif containing GTPase activating protein 2     |
| Lrg1    | 11239.83 | 238.75 | 9.28E-150 | 76905  | leucine-rich alpha-2-glycoprotein 1                 |
| Mnda    | 49.11    | 3.26   | 2.64E-06  | NA     | NA                                                  |
| Muc1    | 1208.43  | 4.63   | 1.67E-13  | 17829  | mucin 1 transmembrane                               |
| Muc2    | 84214.41 | 2.45   | 1.69E-04  | 17831  | mucin 2                                             |
| Muc4    | 5190.55  | 2.88   | 1.39E-17  | 140474 | mucin 4                                             |
| Nos2    | 5879.07  | 59.26  | 2.49E-16  | 18126  | nitric oxide synthase 2 inducible                   |
| Ntn5    | 42.58    | 3.06   | 1.18E-05  | 243967 | netrin 5                                            |
| Pla2g5  | 1764.10  | 5.23   | 1.09E-50  | 18784  | phospholipase A2 group V                            |
| Plet1   | 14962.81 | 226.92 | 1.69E-55  | 76509  | placenta expressed transcript 1                     |
| Prss27  | 113.34   | 18.41  | 1.92E-29  | 213171 | protease serine 27                                  |
| Rab27a  | 1406.10  | 2.57   | 3.07E-16  | 11891  | RAB27A member RAS oncogene family                   |
| Retnlb  | 4272.92  | 10.26  | 1.18E-07  | 57263  | resistin like beta                                  |
| Smpdl3b | 632.52   | 5.14   | 1.27E-25  | 100340 | sphingomyelin phosphodiesterase acid-like 3B        |
| Socs1   | 829.81   | 19.37  | 1.24E-26  | 12703  | suppressor of cytokine signaling 1                  |
| Stat1   | 5491.46  | 6.36   | 7.76E-17  | 20846  | signal transducer and activator of transcription 1  |
| Stat2   | 2690.94  | 2.90   | 2.71E-18  | 20847  | signal transducer and activator of transcription 2  |
| Syt8    | 1081.81  | 2.73   | 2.74E-04  | 55925  | synaptotagmin VIII                                  |
| Vil1    | 25271.06 | 2.18   | 2.14E-15  | 22349  | villin 1                                            |
| Xbp1    | 9698.52  | 2.33   | 2.12E-32  | 22433  | X-box binding protein 1                             |
| Zbp1    | 2292.43  | 11.12  | 1.79E-22  | 58203  | Z-DNA binding protein 1                             |

**DEGs downregulated in VAS-Inf in colon study*****Immune cell-related***

|       | baseMean | FoldChange | padj     | ENTREZID | Fullname                                |
|-------|----------|------------|----------|----------|-----------------------------------------|
| Ahrh  | 22.12    | -2.29      | 3.23E-02 | 11624    | aryl-hydrocarbon receptor repressor     |
| Mmp11 | 122.96   | -6.40      | 4.41E-40 | 17385    | matrix metalloproteinase 11             |
| Mmp15 | 4401.80  | -2.00      | 2.07E-06 | 17388    | matrix metalloproteinase 15             |
| Mmp16 | 22.15    | -5.00      | 8.78E-07 | 17389    | matrix metalloproteinase 16             |
| Mmp17 | 292.05   | -2.73      | 1.09E-04 | 23948    | matrix metalloproteinase 17             |
| Mmp23 | 169.01   | -2.62      | 1.52E-09 | 26561    | matrix metalloproteinase 23             |
| Mmp24 | 19.00    | -2.93      | 3.65E-03 | 17391    | matrix metalloproteinase 24             |
| Timp2 | 2714.83  | -3.07      | 5.13E-12 | 21858    | tissue inhibitor of metalloproteinase 2 |
| Timp4 | 126.76   | -2.55      | 7.88E-07 | 110595   | tissue inhibitor of metalloproteinase 4 |

**DEGs downregulated in VAS-Inf in colon study*****Epithelial cell-originated***

|        | baseMean | FoldChange | padj     | ENTREZID | Fullname                                                    |
|--------|----------|------------|----------|----------|-------------------------------------------------------------|
| Angpt1 | 54.58    | -2.92      | 1.63E-09 | 11600    | angiopoietin 1                                              |
| Cldn1  | 47.37    | -2.27      | 2.08E-02 | 12737    | claudin 1                                                   |
| Cldn5  | 128.73   | -5.38      | 2.85E-08 | 12741    | claudin 5                                                   |
| Id4    | 390.89   | -3.75      | 1.61E-13 | 15904    | inhibitor of DNA binding 4                                  |
| Lgr5   | 457.90   | -2.59      | 7.46E-04 | 14160    | leucine rich repeat containing G protein coupled receptor 5 |
| Nkx2-2 | 51.15    | -2.30      | 8.93E-07 | 18088    | NK2 homeobox 2                                              |
| Rspo2  | 20.23    | -2.88      | 6.04E-03 | 239405   | R-spondin 2                                                 |
| Rspo3  | 144.49   | -3.54      | 8.48E-05 | 72780    | R-spondin 3                                                 |

**Supplementary Table S2.** Colon modules and their sizes, functional annotations, hub genes, and overlap with DEGs in the VAS-Inf comparison

**Abbreviations:**

Differentially expressed gene (DEG)

MS: Module Size. Number of gene in certain modules.

DEG count: number of DEGs (corresponding to the Infection effect) that also belong to certain module

DEG ratio: DEG count/MS

Selective DEGs: DEGs that are also top 5% hub genes

| Module color | MS   | Representative functional annotations                                                                                                 | Top 5% Hub Genes (ranked by connectivity)                                                                                                                                                                                                                                                                                                                                                                                                                                                                                                                                                                                                                                                                                                                                                                                                                                                                                                                                                                                                                                                                                                                                                                                                                                                                                                                                                                                                                                                                                                                                                                                                                                                                                                                                                                                                                                                                                                                                                                                                                                                                                                                                  | DEG count | DEG ratio % |
|--------------|------|---------------------------------------------------------------------------------------------------------------------------------------|----------------------------------------------------------------------------------------------------------------------------------------------------------------------------------------------------------------------------------------------------------------------------------------------------------------------------------------------------------------------------------------------------------------------------------------------------------------------------------------------------------------------------------------------------------------------------------------------------------------------------------------------------------------------------------------------------------------------------------------------------------------------------------------------------------------------------------------------------------------------------------------------------------------------------------------------------------------------------------------------------------------------------------------------------------------------------------------------------------------------------------------------------------------------------------------------------------------------------------------------------------------------------------------------------------------------------------------------------------------------------------------------------------------------------------------------------------------------------------------------------------------------------------------------------------------------------------------------------------------------------------------------------------------------------------------------------------------------------------------------------------------------------------------------------------------------------------------------------------------------------------------------------------------------------------------------------------------------------------------------------------------------------------------------------------------------------------------------------------------------------------------------------------------------------|-----------|-------------|
| black        | 246  | MHC protein complex                                                                                                                   | Tmem106a Cxcr3 Neat1 Gpr55 Rdh16 Ciita Dram2<br>Mgat1 Slc37a1 Ccdc116 H2-T23 Ppp6r1 Agpat1                                                                                                                                                                                                                                                                                                                                                                                                                                                                                                                                                                                                                                                                                                                                                                                                                                                                                                                                                                                                                                                                                                                                                                                                                                                                                                                                                                                                                                                                                                                                                                                                                                                                                                                                                                                                                                                                                                                                                                                                                                                                                 | 5         | 2.03%       |
|              |      |                                                                                                                                       | Prrc2b Tbccd1 Hoxd12 Fhit Zmiz1 Tusc5 Syde2 Syn3<br>Gng3 1700001L05Rik Unc80 Ulk1 Chrna5 Tshz1 Zfp516<br>Raver2 Slc2a4rg-ps Trim44 Rprml Mrc2 Dnah5 Glis2<br>Ccdc157 Kazald1 Wdct1 Dpysl3 Foxp1 Casp9 Plekha4<br>Ccdc15 Tmem237 Zscan18 Sesn3 Acadvl Ephx4<br>Camk2g 1700109H08Rik Cox7a2l Fendrr Fam193b Flt3l<br>Rab11fip5 9330182L06Rik Fzd2 Kif3c Nkx2-2<br>C920006O11Rik Ddrgk1 Fabp2 Ccdc57 Adam19 Kxd1<br>Fn3k Gsdmc2 Gm11240 Lix1 Pcnx Fbn1 Vwa1 Tob2<br>Pcdhb16 Rab4a Fam189a2 Pou2f3 Igf1 Rab30 Nudt16<br>Tgfb1 1300002E11Rik Trpm5 Mapk8ip3 Ago3 Nr2c2<br>Car15 Col9a2 Anks1 Zcchc18 Slitrk1 Ism1 Usp20<br>Plekho2 Gm4262 Plxbn3 Lca5 Col25a1 Slu7 Nhlrc1<br>2610044O15Rik8 Eci3 Mmp2 Zfp846 Capn3 Cav3<br>Zfp346 Ppic Mir678 Tmem163 Arhgap20 Sema3d<br>P4htm 9230114K14Rik Asphd2 Add2 Vezf1 Zfp592<br>Pds5b Adh1 D430019H16Rik Acad10 Klhl36 Stra6l<br>Gpank1 Zfp595 Crb2 Casq2 Efhd1 Coro2b Ulk2 Fgfr11<br>Pcgf1 Musk Htr3a Cacna1c Tmem132a Zfp94 Map3k3<br>4930511M06Rik Ypel1 Slc45a1 Ctnnd2 Tomm6os<br>Emp3 1110002L01Rik Acss1 Rgs7 Rhebl1<br>1010001N08Rik Susd1 Rab36 Slc26a11<br>4930402H24Rik Hip1 Npy4r Resp18 Gm12359 Trim62<br>Rsl1 Hrg Col11a2 Sh3gl2 Wnt6 Pcdh20 Bcl9 Hint1<br>Atg10 Nr1h5 Recql5 Kcnv1 Tet1 1700123I01Rik<br>Plekha5 Lrp12 Gm6277 Hoxa5 Adgrb3 Scamp5 Car3<br>Aamdc Slc7a2 Zfp748 Syt7 Fbxl16 Tbbkbp1 Chd5 Sh3rf3<br>Zfp316 Cntln 2510009E07Rik Slc24a3 Meis1 Tceanc2<br>Jakmip3 Lrp3 Edn1 Itm2b Zfp629 Khk Flywch1 Cdy12<br>Cyp2f2 Pank4 Dcdc2b Arhgef37 Numb1 Zfyve28<br>Slc10a4 Eppk1 Fam184a Ces2c Mettl7b Zmat1 Dcp1b<br>Trpm3 Cmklr1 Sdc4 Spata2l Eng Cilp Tubal3 Gm10336<br>Atad3aos Cep131 Arhgap10 Zfp108 Tril Ucp3<br>6430573F11Rik Prune2 Fam163a Id4 C1qtnf4 Il17d<br>Eif2ak4 Lrsam1 Fcgrt Sez6l Oaz3 Stk17b Ccbe1 Xpc<br>Pard3b Cplx1 Zkscan8 Ggn Ptrf Sepp1 Abca8a<br>1700037H04Rik Socs7 Pde4a Zeb2os Tmem8b Fez1<br>Gabra3 Fbln2 Sulf1 Mapt Zfp141 Fat2 Map7d2 Sfrp1<br>Tpgrl Angptl1 Ilvbl Tspyl5 Cap2 Inafm1 Hist1h1e Ddit4l<br>Zfp157 Sepn1 Nsg2 Plcd4 Cml1 Maf Ndn Hcst Anxa6<br>Prmt2 Lrrc27 Zfp956 Rassf10 Gm20257 Ptgir Ugt2b35<br>Araf Arap3 Plekha1 Bend4 2310001H17Rik Zfp638<br>Zfp329 Ryr3 Hexdc | 2967      | 52.29%      |
| blue         | 5674 | chemical synaptic transmission, axon development, regulation of transmembrane transport, extracellular matrix, cation channel complex | Tmem43 Rnf39 Elmo3 Nfatc2 Pygo2 Fbxo11 Saa3<br>Mmp10 Fbxo11 Tlcd2 Timp1 Brap Mink1 Liph<br>Tmem41a Wdr26 Med15 Timp1 Zbtb48 Dok7 Trim29<br>Ano6 Zfc3h1 Adnp Polk Zfp322a Stx19 Krt7                                                                                                                                                                                                                                                                                                                                                                                                                                                                                                                                                                                                                                                                                                                                                                                                                                                                                                                                                                                                                                                                                                                                                                                                                                                                                                                                                                                                                                                                                                                                                                                                                                                                                                                                                                                                                                                                                                                                                                                        | 89        | 15.42%      |
| green        | 466  | cytoplasmic translation, ribosome                                                                                                     | Mir7079 Pitrm1 Reps1 Slc38a10 Dtnbp1 Ptpro Rad51b<br>Mfsd6l Rcl1 Ppp2cb Pdcd2 Wdr53 Polr3h Rps10                                                                                                                                                                                                                                                                                                                                                                                                                                                                                                                                                                                                                                                                                                                                                                                                                                                                                                                                                                                                                                                                                                                                                                                                                                                                                                                                                                                                                                                                                                                                                                                                                                                                                                                                                                                                                                                                                                                                                                                                                                                                           | 9         | 1.93%       |



|             |      |                                                                                                                                                                                                                                                                                     |                                                                                                                                                                                                                                                                                                                                                                                                                                                                                                                                                                                                                                                                                                                                                                                                                                                                                                                                                                                                                                                                                                                                                                                                                                                                                                                                                                                                                                                                                                                                                                                                     |      |        |
|-------------|------|-------------------------------------------------------------------------------------------------------------------------------------------------------------------------------------------------------------------------------------------------------------------------------------|-----------------------------------------------------------------------------------------------------------------------------------------------------------------------------------------------------------------------------------------------------------------------------------------------------------------------------------------------------------------------------------------------------------------------------------------------------------------------------------------------------------------------------------------------------------------------------------------------------------------------------------------------------------------------------------------------------------------------------------------------------------------------------------------------------------------------------------------------------------------------------------------------------------------------------------------------------------------------------------------------------------------------------------------------------------------------------------------------------------------------------------------------------------------------------------------------------------------------------------------------------------------------------------------------------------------------------------------------------------------------------------------------------------------------------------------------------------------------------------------------------------------------------------------------------------------------------------------------------|------|--------|
|             |      | biogenesis, ncRNA processing, rRNA metabolic process, mRNA binding, nuclease activity                                                                                                                                                                                               | Hmga1-rs1 Snapc4 Snhg8 G6pc3 Ewsr1 Lsm11 Adh5 Ewsr1 Ccdc14 Fhl3                                                                                                                                                                                                                                                                                                                                                                                                                                                                                                                                                                                                                                                                                                                                                                                                                                                                                                                                                                                                                                                                                                                                                                                                                                                                                                                                                                                                                                                                                                                                     |      |        |
| greenyellow | 174  | transcription cofactor activity, transcription factor activity, protein binding, proximal promoter sequence-specific DNA binding                                                                                                                                                    | Dbp Ncoa4 Cipc Ccbl1 Trp53inp1 Rest Zswim6 Fam126b Fam76a                                                                                                                                                                                                                                                                                                                                                                                                                                                                                                                                                                                                                                                                                                                                                                                                                                                                                                                                                                                                                                                                                                                                                                                                                                                                                                                                                                                                                                                                                                                                           | 20   | 11.49% |
| grey        | 897  | -                                                                                                                                                                                                                                                                                   | -                                                                                                                                                                                                                                                                                                                                                                                                                                                                                                                                                                                                                                                                                                                                                                                                                                                                                                                                                                                                                                                                                                                                                                                                                                                                                                                                                                                                                                                                                                                                                                                                   | 8    | 0.89%  |
| magenta     | 191  | -                                                                                                                                                                                                                                                                                   | Stard4 Phf20l1 Eif2ak1 Mob1b Amfr Brd1 Arl6ip6 Hpse Dyrk1a Zfp407                                                                                                                                                                                                                                                                                                                                                                                                                                                                                                                                                                                                                                                                                                                                                                                                                                                                                                                                                                                                                                                                                                                                                                                                                                                                                                                                                                                                                                                                                                                                   | 0    | 0%     |
| pink        | 241  | leukocyte mediated immunity, adaptive immune response, lymphocyte mediated immunity, leukocyte migration, response to bacterium, T cell activation, neutrophil activation, phagocytosis, B cell mediated immunity                                                                   | Mx2 Havcr2 Cxcl10 Plek Fam177a Tigit Ctrl Crif3 Ocstamp Mzb1 2310045n01rik-mef2b Egr2                                                                                                                                                                                                                                                                                                                                                                                                                                                                                                                                                                                                                                                                                                                                                                                                                                                                                                                                                                                                                                                                                                                                                                                                                                                                                                                                                                                                                                                                                                               | 58   | 24.07% |
| purple      | 184  | anion transmembrane transporter activity                                                                                                                                                                                                                                            | Xrn1 Rasf Ptgr2 Dgkd Tmtc2 Clic5 Akap10 Slc7a9 Ush1c Lrp6                                                                                                                                                                                                                                                                                                                                                                                                                                                                                                                                                                                                                                                                                                                                                                                                                                                                                                                                                                                                                                                                                                                                                                                                                                                                                                                                                                                                                                                                                                                                           | 0    | 0%     |
| red         | 258  | -                                                                                                                                                                                                                                                                                   | Gjb3 Efna4 Cln6 Ttc26 Ngrn Smim5 S100g Fmo1 2010320M18Rik Csp1 Rgcc Parp1 Smoc2                                                                                                                                                                                                                                                                                                                                                                                                                                                                                                                                                                                                                                                                                                                                                                                                                                                                                                                                                                                                                                                                                                                                                                                                                                                                                                                                                                                                                                                                                                                     | 25   | 9.69%  |
| tan         | 87   | positive regulation of secretion by cell, cytokine secretion                                                                                                                                                                                                                        | Gm14440 Il1b Galnt6 Xkr4 Arg2                                                                                                                                                                                                                                                                                                                                                                                                                                                                                                                                                                                                                                                                                                                                                                                                                                                                                                                                                                                                                                                                                                                                                                                                                                                                                                                                                                                                                                                                                                                                                                       | 12   | 13.79% |
| turquoise   | 5799 | mRNA processing, ncRNA metabolic process, chromosome segregation, ribosome biogenesis, RNA splicing, mitochondrion organization, establishment of protein localization to organelle, Golgi vesicle transport, tRNA metabolic process, ubiquitin-dependent protein catabolic process | Xpnp1 Psm2 Pmpca Psm6 Pde12 Ywhae Tpm3 Metap2 Ppp1ca Phf5a Morf4l2 Lrrc47 Mphosph6 Nars Txnl1 Ddah1 Itpa Tor2a Lsm12 Ccdc43 Tars Pmm2 Ykt6 Mta2 Rad23b Etf1 Gnb2 Plaa Golt1b Ciapin1 Bzw1 Gars Ddx39 Eif5a Pgd Ap3m1 Med8 Rpl7l1 Ccdc124 Prelid1 Dera Cct6a Ybx1 Psme3 P4hb Hsd17b12 Mrpl4 Dnajc10 Tmem79 Chmp6 Nudcd2 Psm13 Mrpl12 Taf2 H2afz Mrpl18 Psma3 Gorasp2 Prdx1 Tomm22 Cul2 Rab8a Cfl1 E2f4 Ube2n Shkbp1 Hmbs Tmed9 Ap2m1 Lamtor1 Kctd5 Vcp Ap1s1 Ube2l3 Smu1 Hn1l Zdhhc3 Gtf2f2 Psmc3 Actr1a Ttc13 Gspt1 Cdv3 Keap1 Fdps Rars Tmem14c Lsm6 Gmds Tfdp1 Farsa Psm14 Dnaaf5 Cltb Slc35a4 Scamp4 Ralb Aars Ppih Ppp2r1b Rps6ka1 Gnb1 Crpc Psm11 Tomm40 Srp72 Pmvk Psmc1 Psmc2 Lsm4 Slc30a7 Hnrnp1 Mrpl36 Hspa14 Larp1b Psm1 Afg3l1 Atpaf2 Dnajc11 Tmed2 Ccdc109b Psm7 Pdap1 Dpp3 Anxa4 Nmt1 Hars Pkp2 Mrpl37 Sub1 Clic1 Ergic2 Arhgdia Cstf3 Srp9 Tuba1c Myd88 Ostc Dazap1 Syng1 Nckap1 Ywhah Psmc6 Tuba4a Mrpl10 Exosc3 Med10 Eif4g1 Glo1 Eif4e Rqcd1 Ccar2 Mrpl47 Cdkn2aip1 Aggf1 Naa15 Mrps7 Dcaf13 Cdc34 Mrpl21 Bpgm Ywhaz Dpp9 Srsf9 Ccdc115 Klhdc4 Snrpb2 Psmc4 Mvp Pdcd6 Rbm14 Traf7 Nme1 Prpf38a Fam207a Ube2k Metap1 Eif2b5 Slc35c1 Rab1 Pigk Tmem126a Usp5 Ssr1 Ccdc25 Mrpl46 Hdac1 Ppp2r1a Nr2c2ap Lsm3 Ttc39a Ncbp1 Prelid2 Mrps25 Ythdf2 E2f2 Ptk2 Smarcb1 Gsr Sf3a1 Dync1li1 Bud31 Eif1ad Mrpl20 Pdia3 B3gnt3 Bbip1 Cog2 Akt1 Gdi2 Akr1a1 Pgs1 Cars Pcbp1 Rab35 Psm8 Ppp4c Mrpl11 Mrps14 Nol7 Dolpp1 Ripk3 Mmadhc Acsl5 Strap Nadk Adrm1 Hspe1 Eno1b Znhit1 Casp8 Eno1 Psma2 Jag1 Psm3 Uchl3 Psm12 Med19 Lrrc59 Asna1 Nudt5 Gnai3 Cpne2 Copb2 Prkrip1 Cops5 Atxn7l3 Ltbr Hspa4 | 1255 | 21.64% |

|        |     |                                                                                                                                                                                                                                                                                                                                                                                                                                                          |                                                                                                                                                                                                                                                                               |    |        |
|--------|-----|----------------------------------------------------------------------------------------------------------------------------------------------------------------------------------------------------------------------------------------------------------------------------------------------------------------------------------------------------------------------------------------------------------------------------------------------------------|-------------------------------------------------------------------------------------------------------------------------------------------------------------------------------------------------------------------------------------------------------------------------------|----|--------|
|        |     |                                                                                                                                                                                                                                                                                                                                                                                                                                                          | Cdk16 Ubfd1 Kti12 Cacybp Map2k2 Dap Pak1ip1<br>Mrpl35 Trim27 Cks1b Fgfbp1 Dnajc25 Pnpt1 Arpc2<br>Gusb Gatad2a U2af2 Hnrnpf Vdac1 Adat3 Nars2<br>Coro1c Ap2a1 Pgk1 Tmsb10 Capzb Rsl24d1 Ercc3<br>Kcnk6 Gale Snd1 Ran Lsm5 Psmb7 Nploc4 Samm50<br>Arpc4 Rer1 Sidt1 Gnai2 Pla2g5 |    |        |
| yellow | 546 | T cell activation,<br>adaptive immune<br>response, leukocyte<br>differentiation,<br>lymphocyte<br>differentiation, B cell<br>activation,<br>mononuclear cell<br>proliferation,<br>leukocyte cell-cell<br>adhesion, interferon-<br>gamma production,<br>positive regulation of<br>cytokine biosynthetic<br>process, gamma-delta<br>T cell activation,<br>interleukin-4<br>production, toll-like<br>receptor signaling<br>pathway, mast cell<br>activation | Ppfia4 Atp8b2 Grap Ncf1 Gpnmb Celf2 Tespa1 Cybb<br>Kcnab2 Fyb Lmo2 Pcdh15 Tnfsf8 P2ry13 Gpr171 Rasal3<br>Sit1 Dok3 Ceacam16 Zfp382 Ifi203 Pik3ap1 Ikzf1<br>Nup62-il4i1 Rorc Fermt3 Clec4n Magi2                                                                               | 76 | 13.92% |
